# Supplementary material for: Synthesis of ω-Chloroalkyl Aryl Ketones via C–C Bond Cleavage of tert-Cycloalkanols with Tetramethylammonium Hypochlorite
Source: MDPI journal article supplement (doi:10.3390/molecules29081874), 2024-04-19

# Synthesis of $\omega$ -Chloroalkyl Aryl Ketones via C–C Bond Cleavage of *tert*-Cycloalkanols with Tetramethylammonium Hypochlorite

Natsumi Hanazawa, Masami Kuriyama,  
Kosuke Yamamoto and Osamu Onomura\*

Graduate School of Biomedical Sciences, Nagasaki University,  
1-14 Bunkyo-Machi, Nagasaki 852-8521, Japan

\* onomura@nagasaki-u.ac.jp

## Supporting Information

### Table of Contents

|                                                                                   |        |
|-----------------------------------------------------------------------------------|--------|
| 1. $^1\text{H}$ , $^{13}\text{C}\{^1\text{H}\}$ , and $^{19}\text{F}$ NMR spectra | S2-S13 |
|-----------------------------------------------------------------------------------|--------|

# 1. $^1\text{H}$ , $^{13}\text{C}\{^1\text{H}\}$ , and $^{19}\text{F}$ NMR spectra

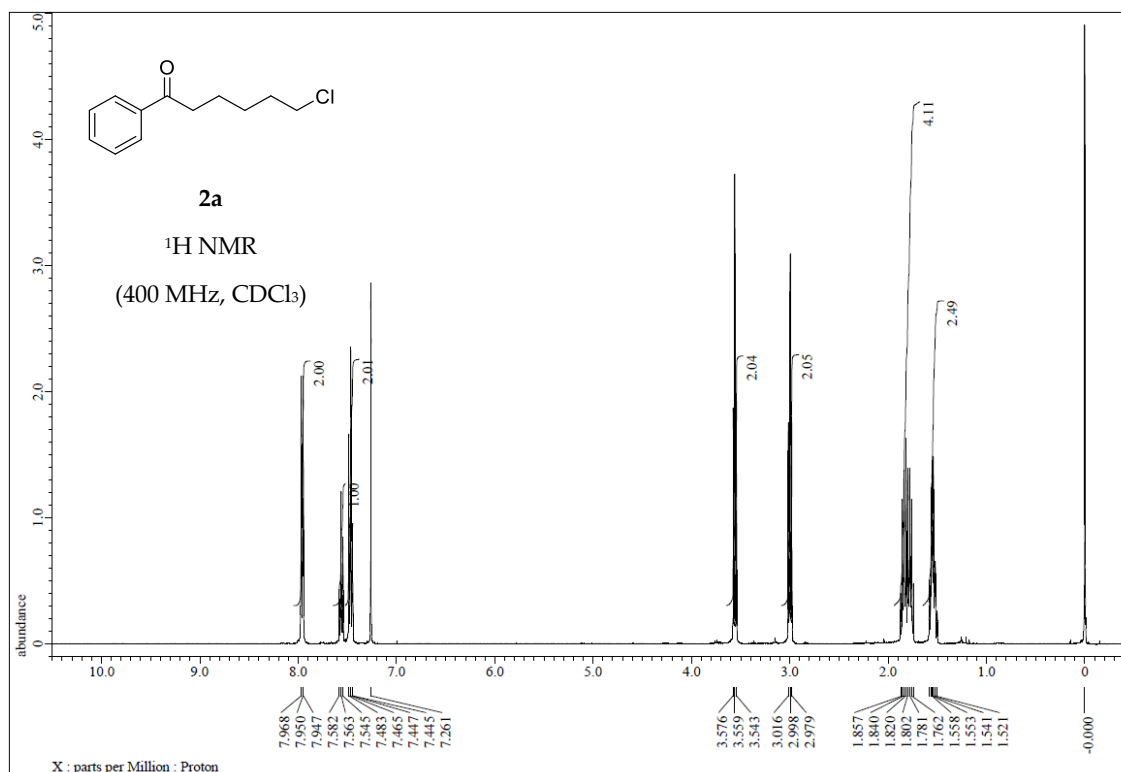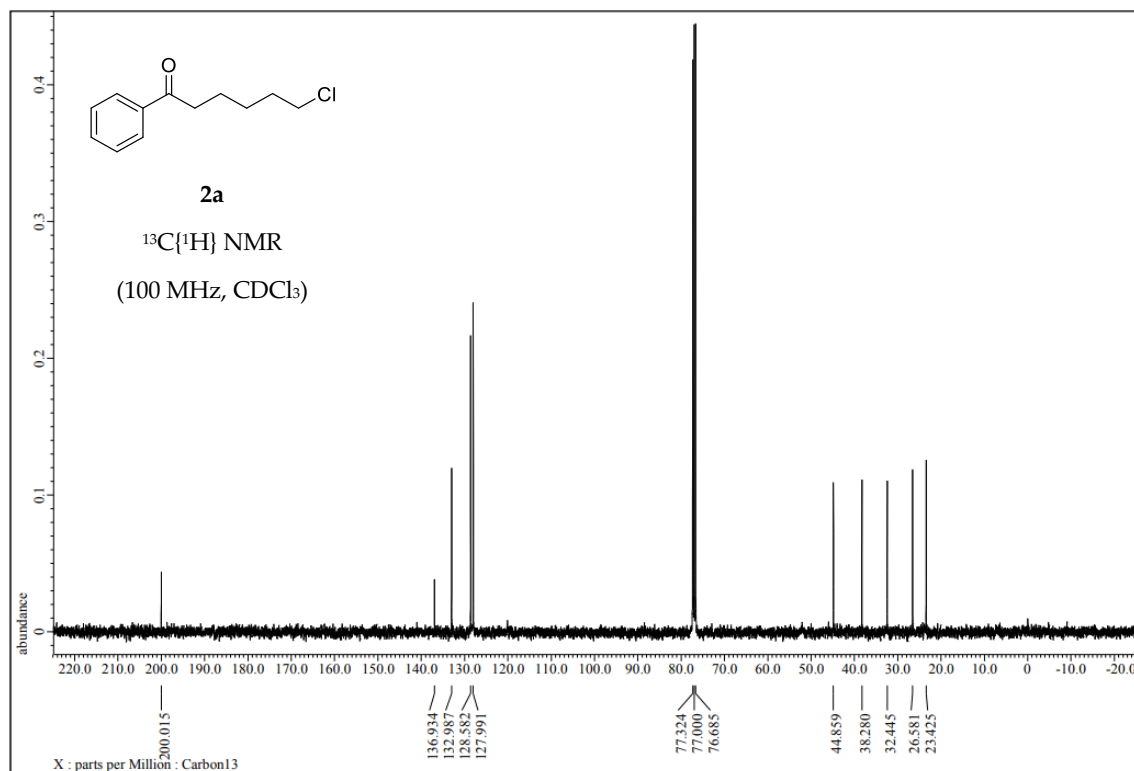

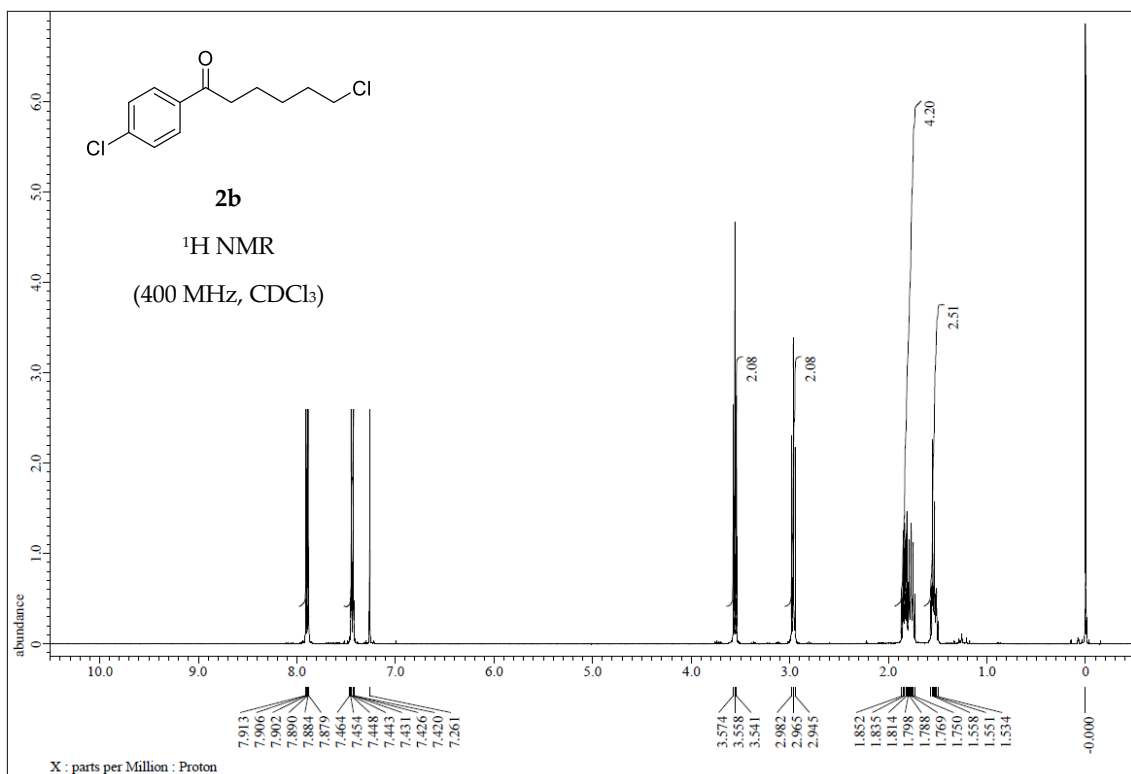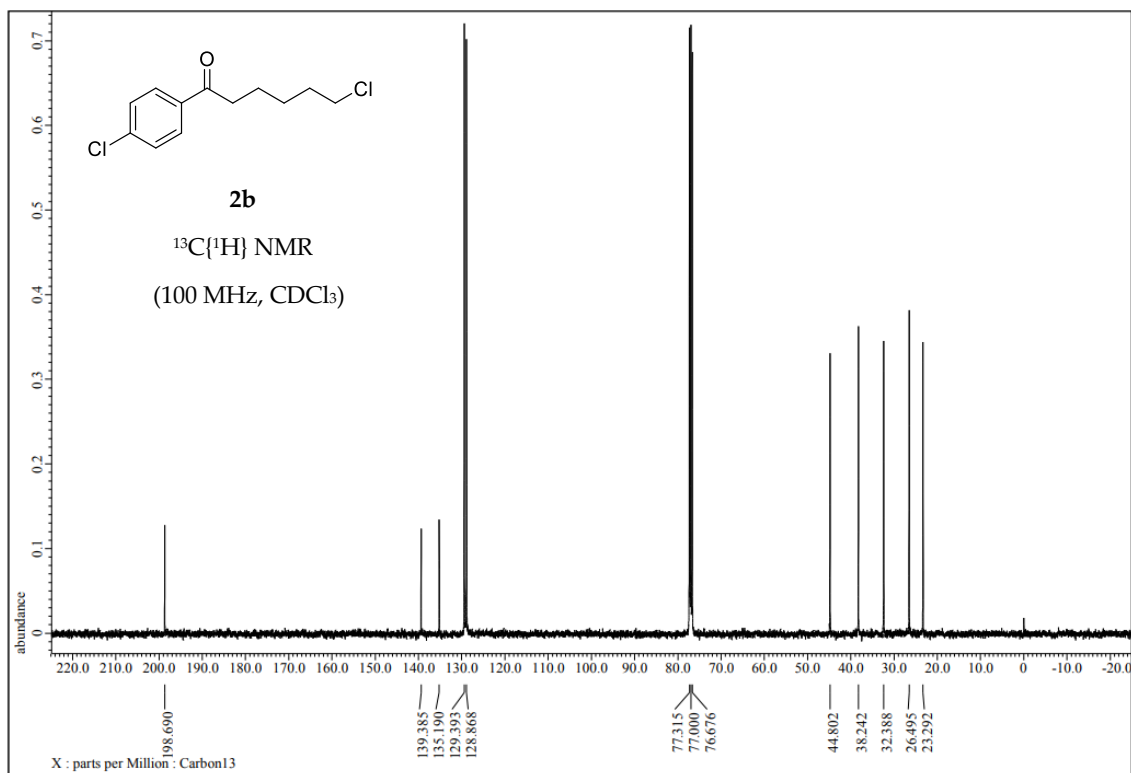

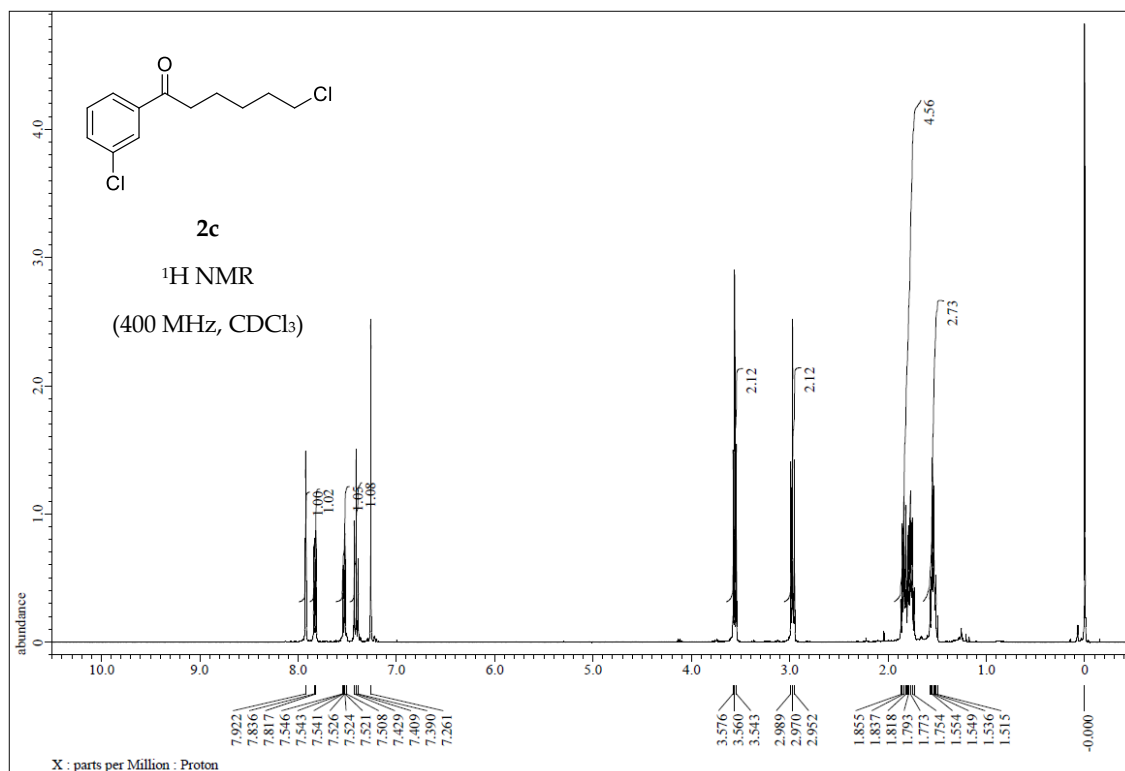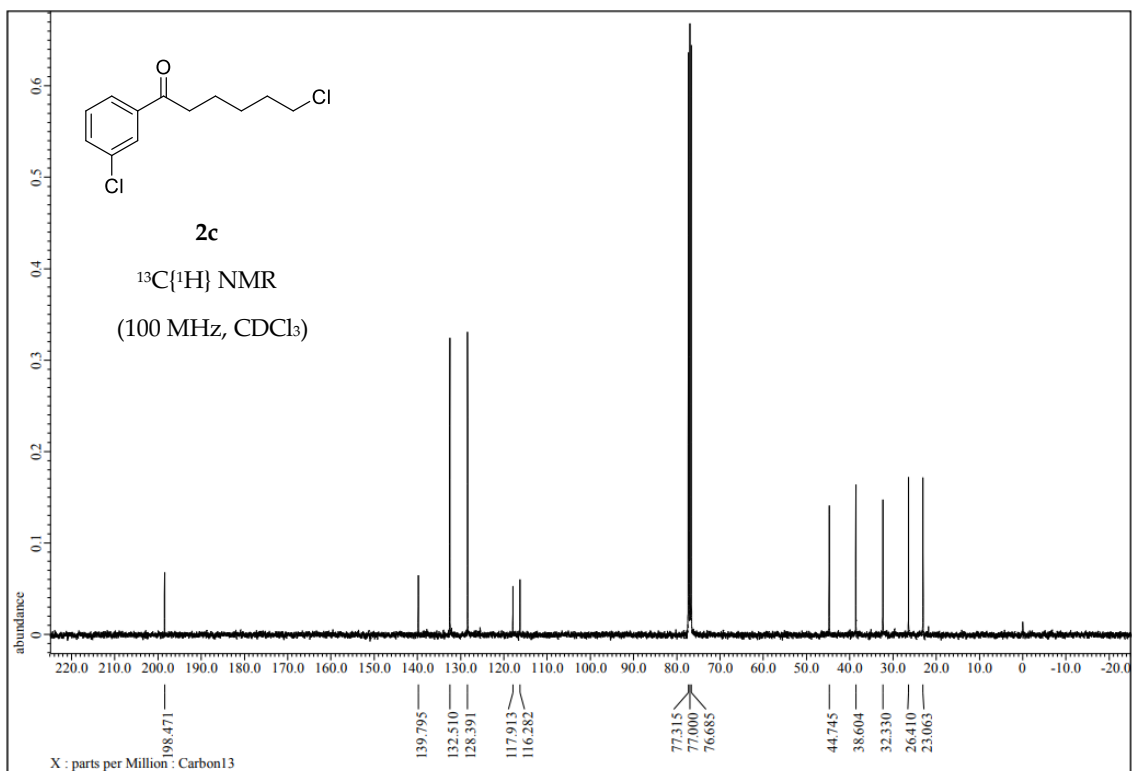

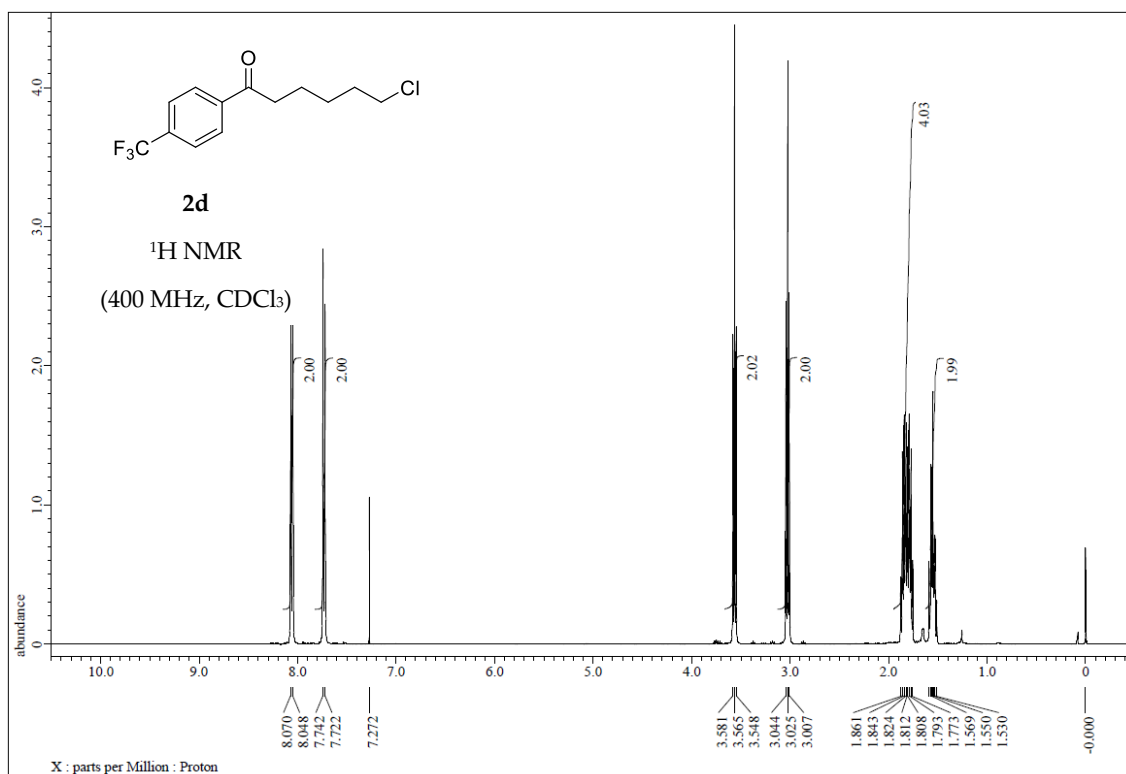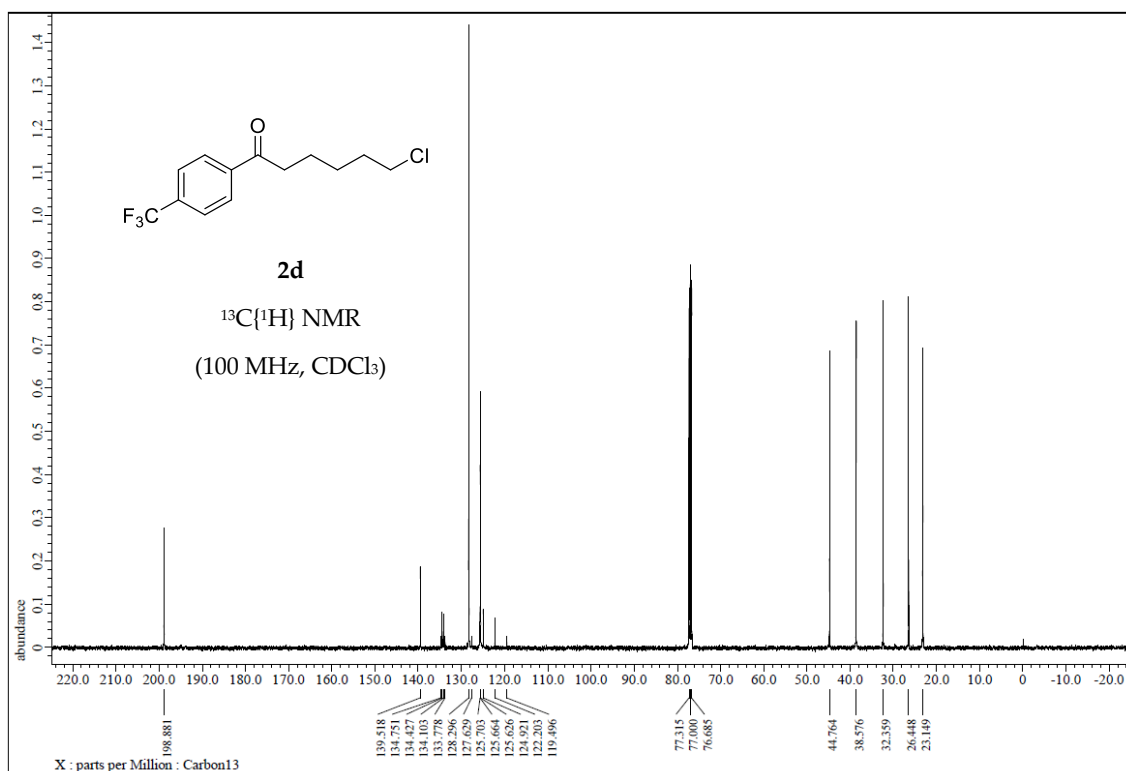

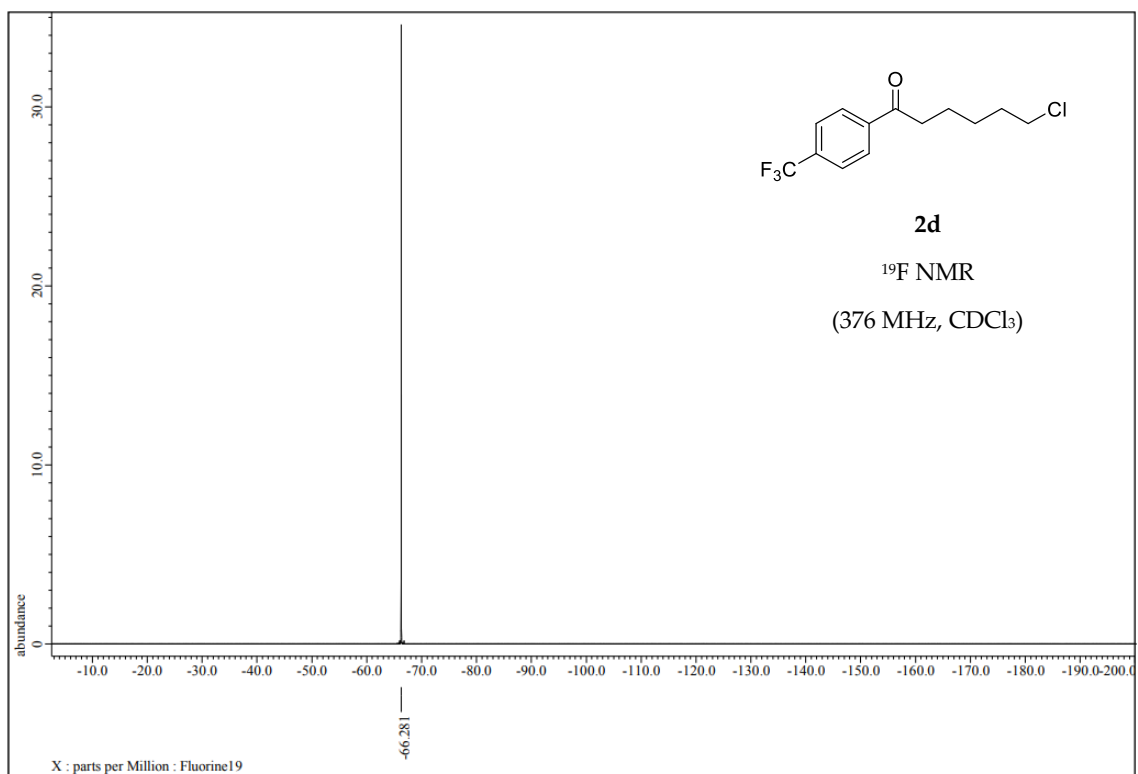

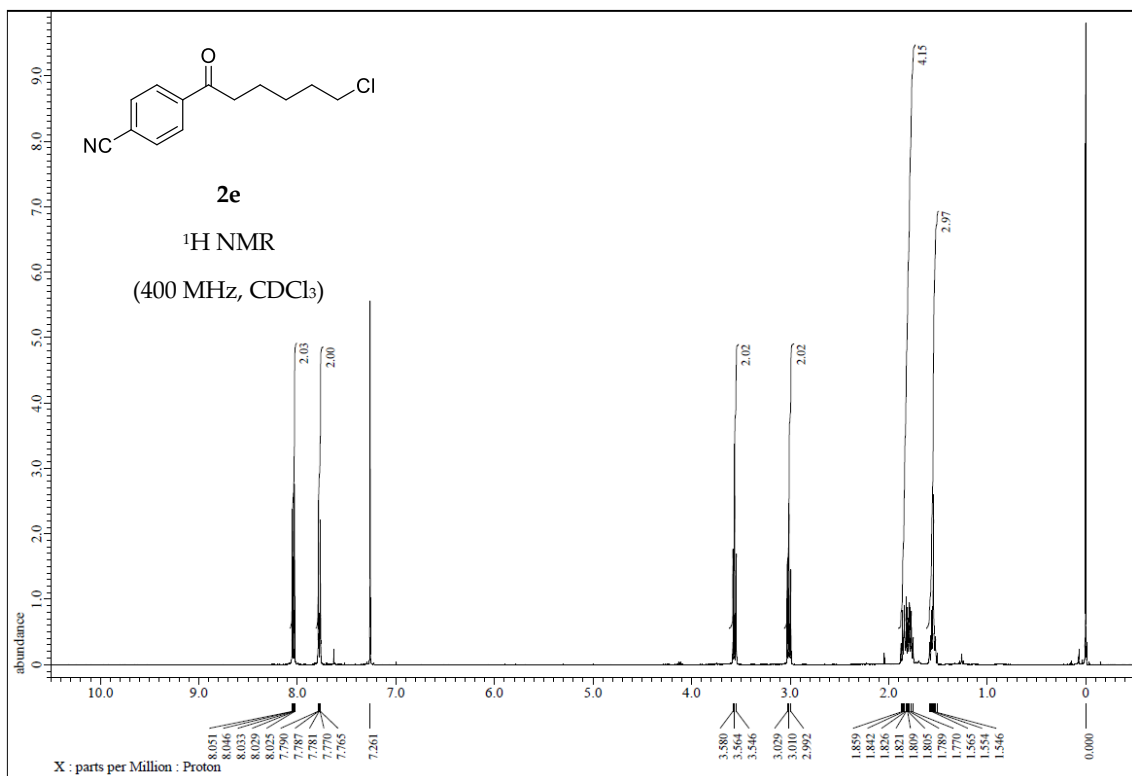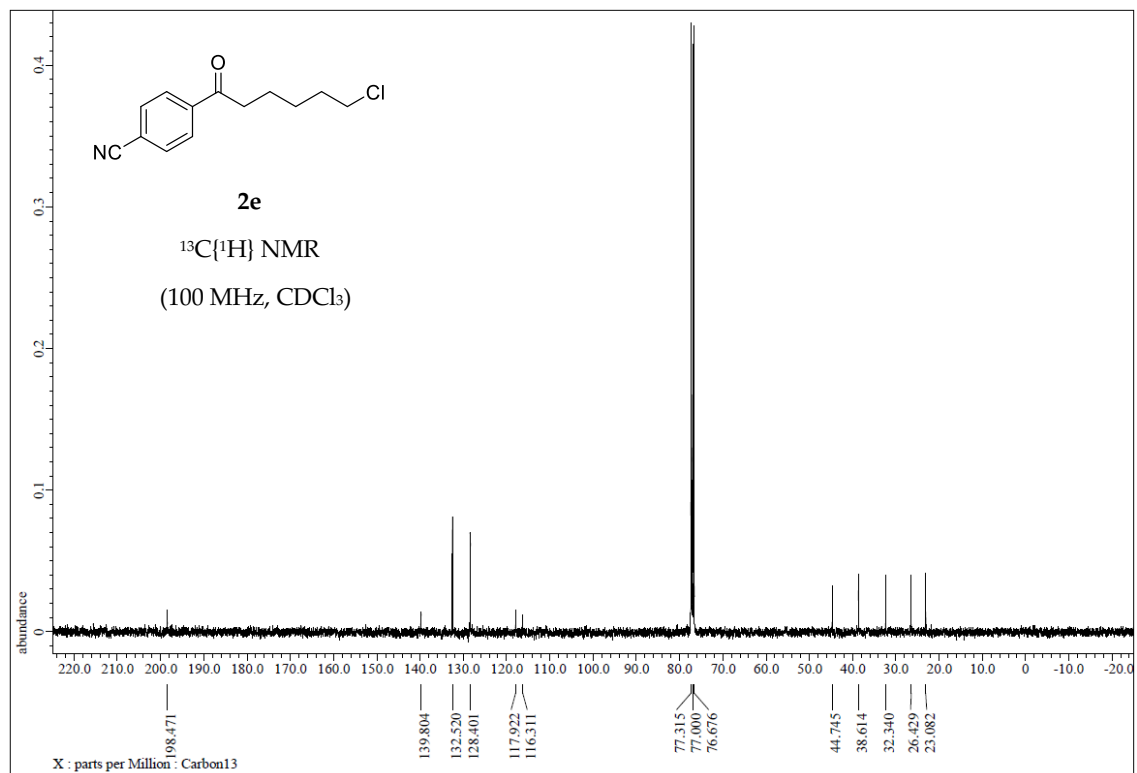

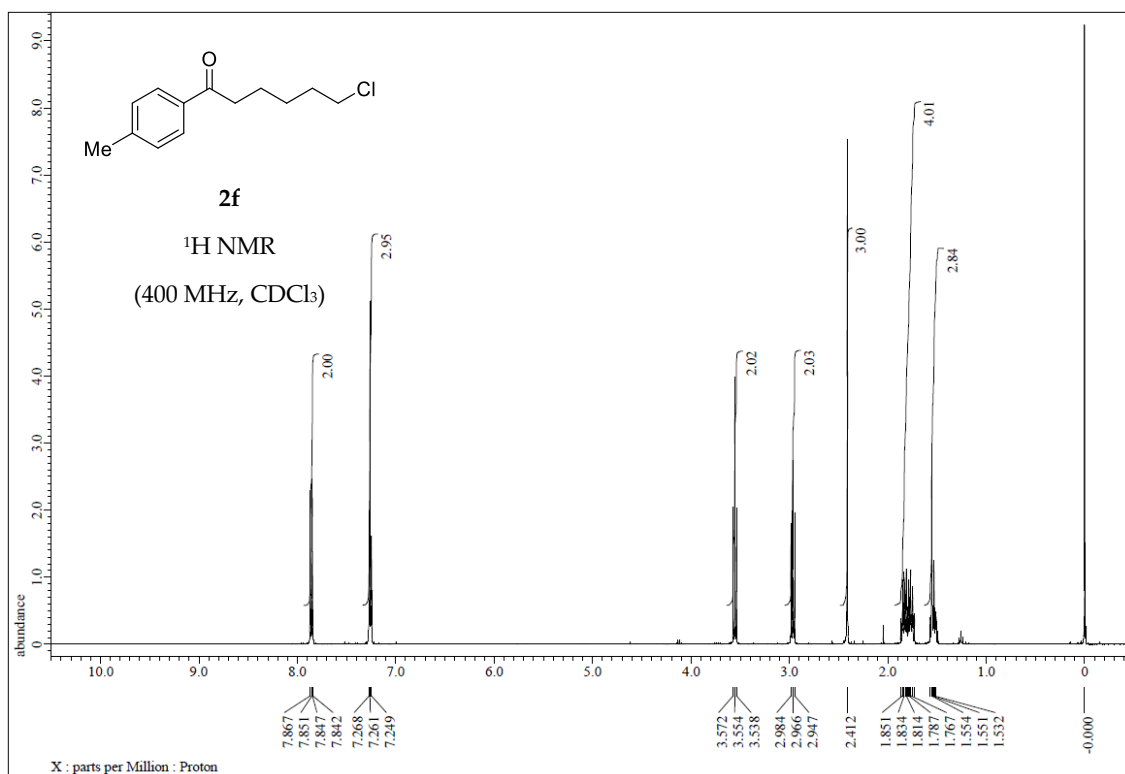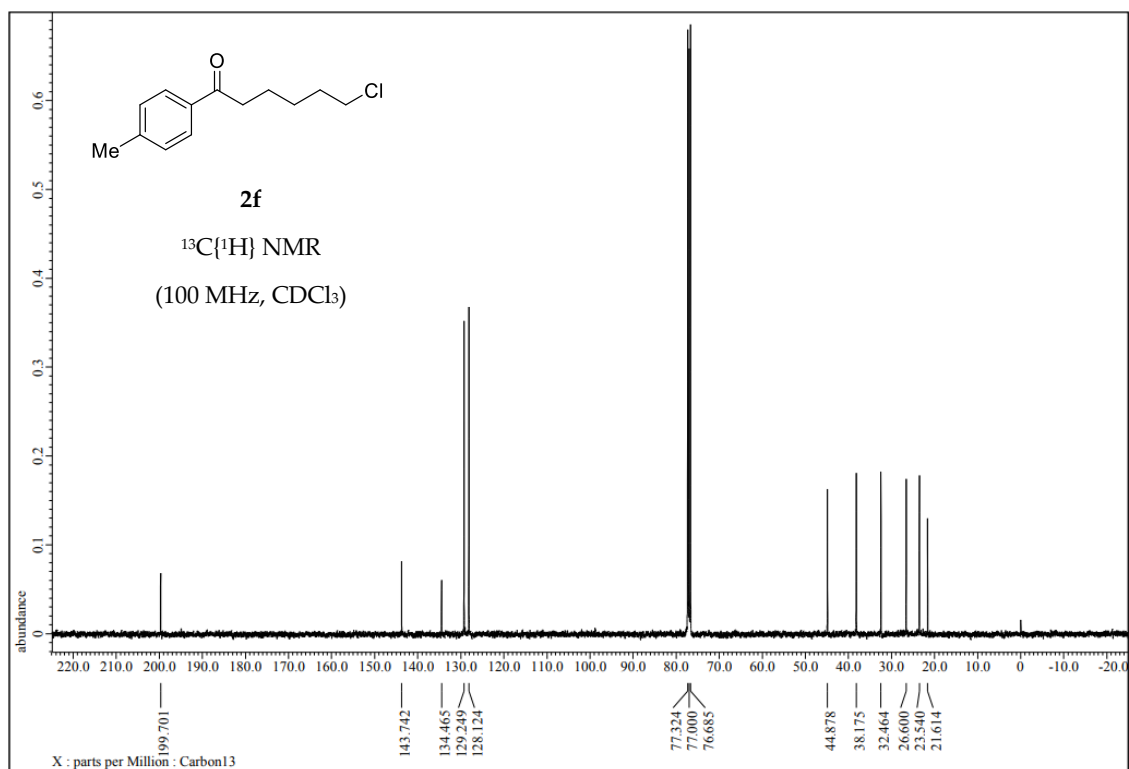



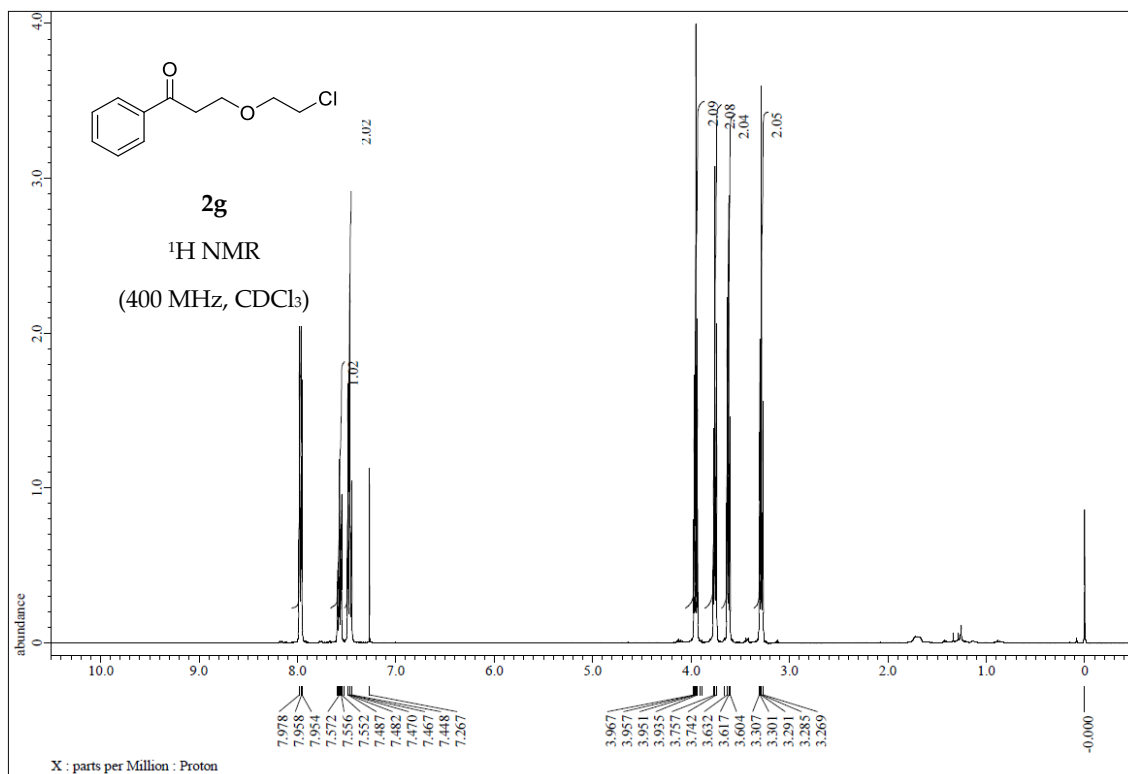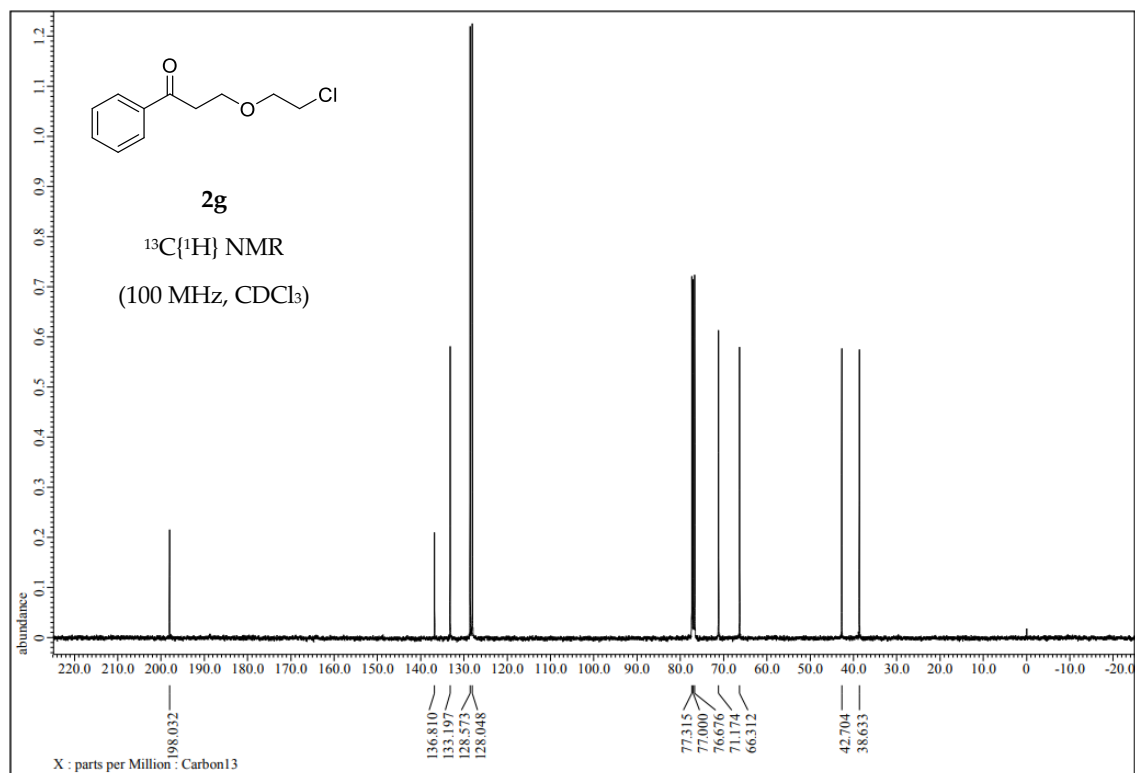

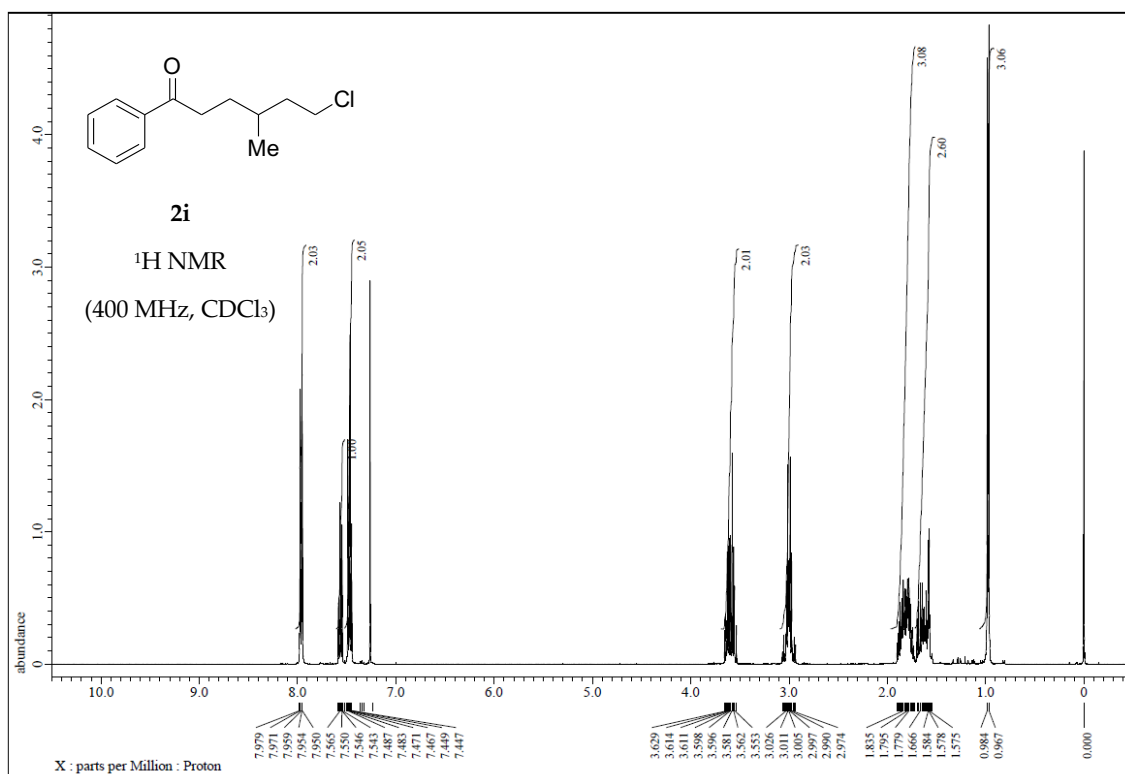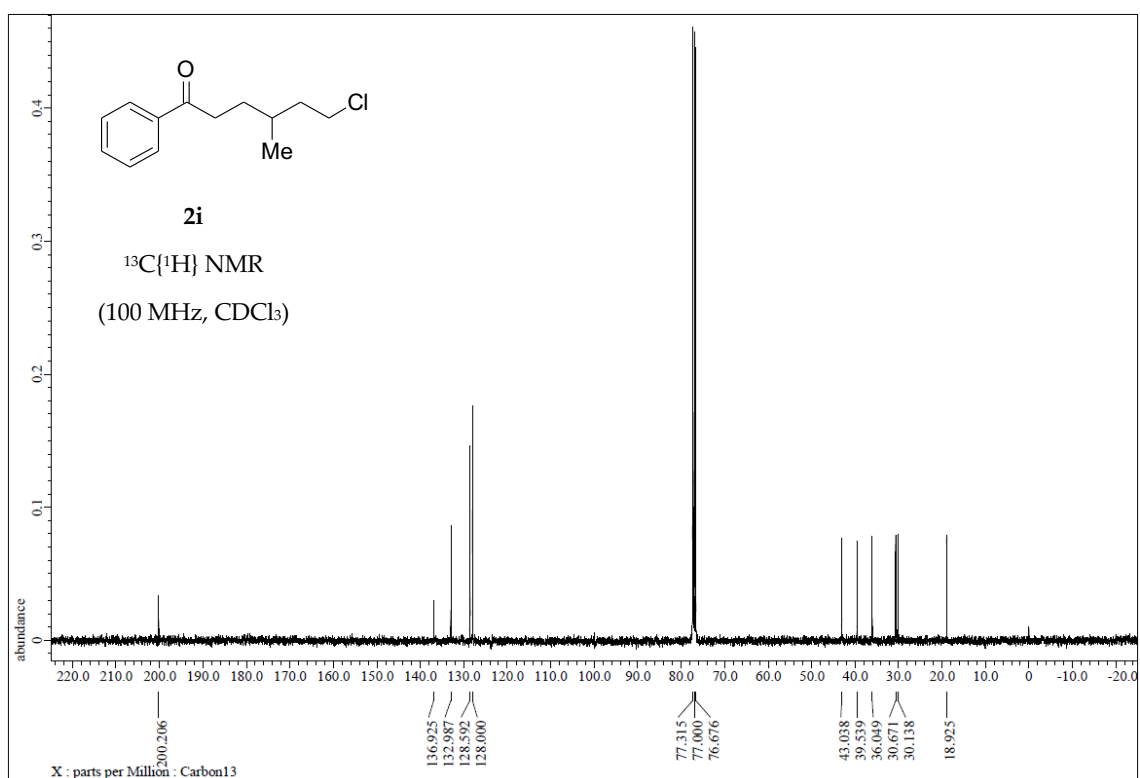

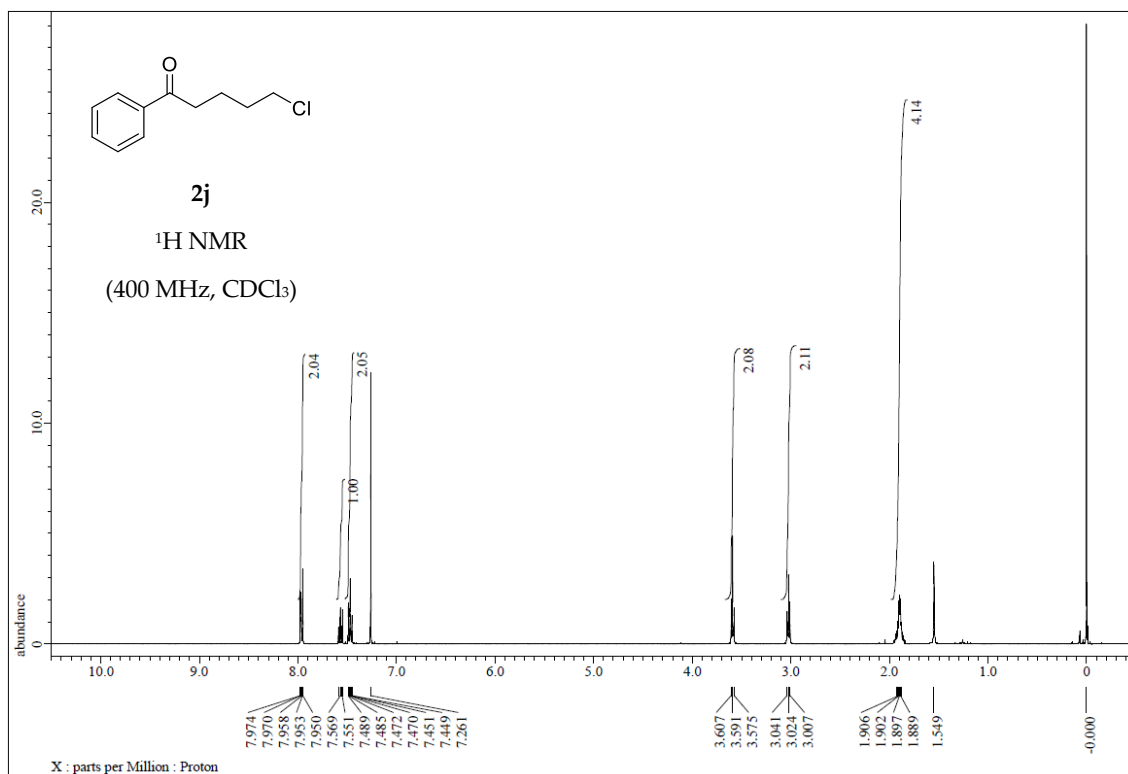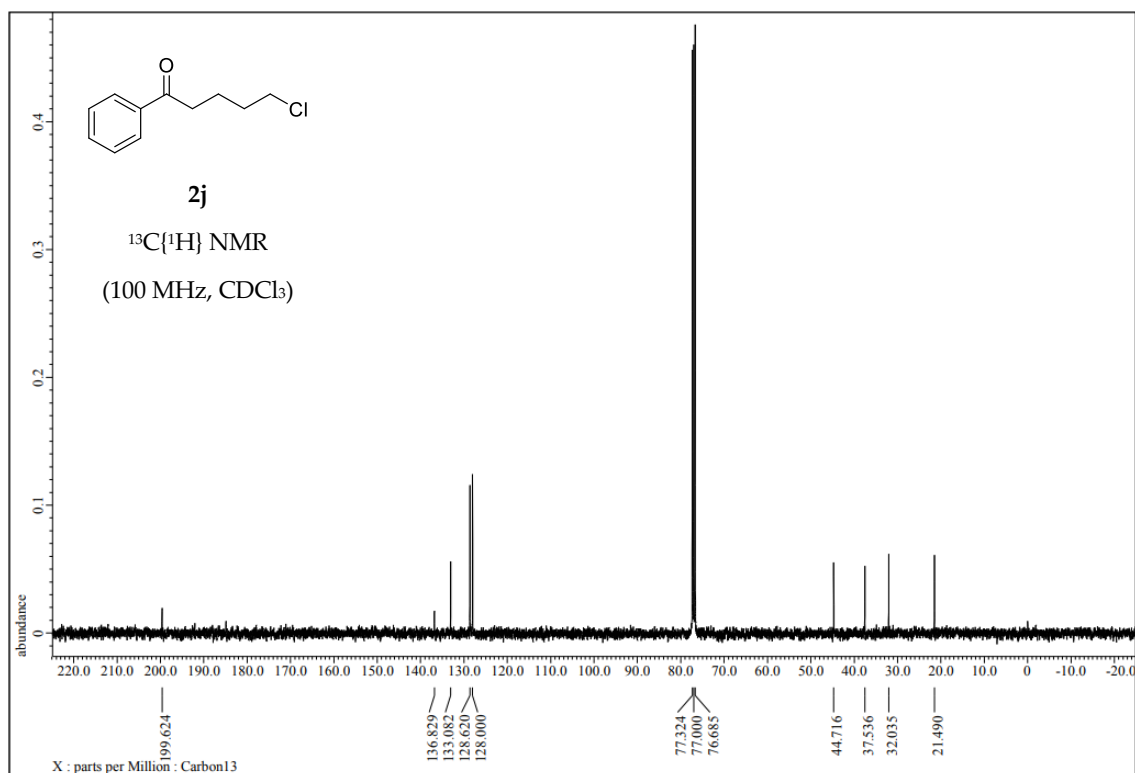

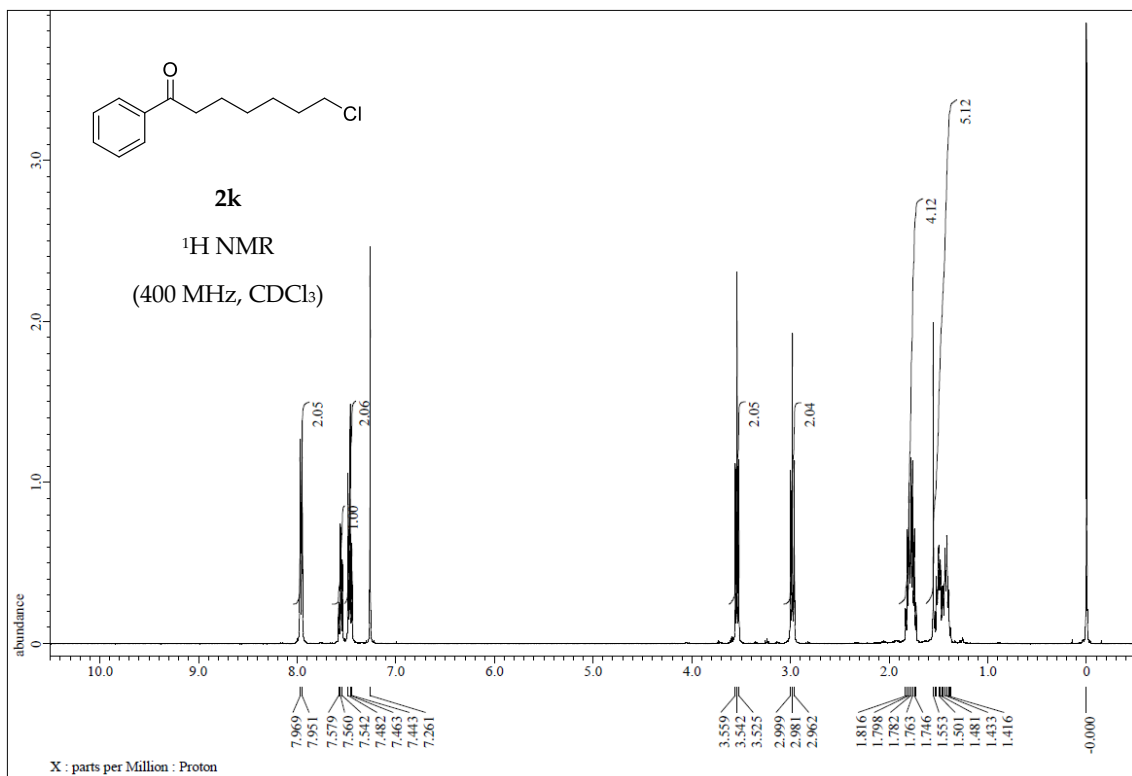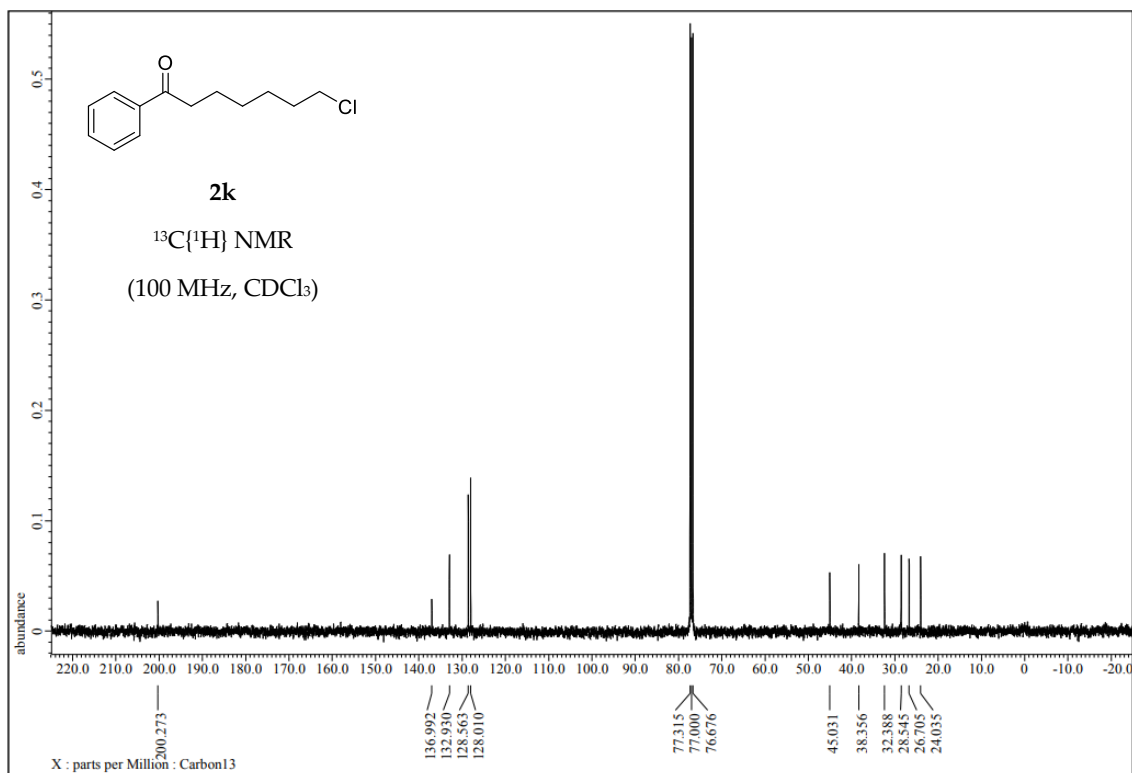

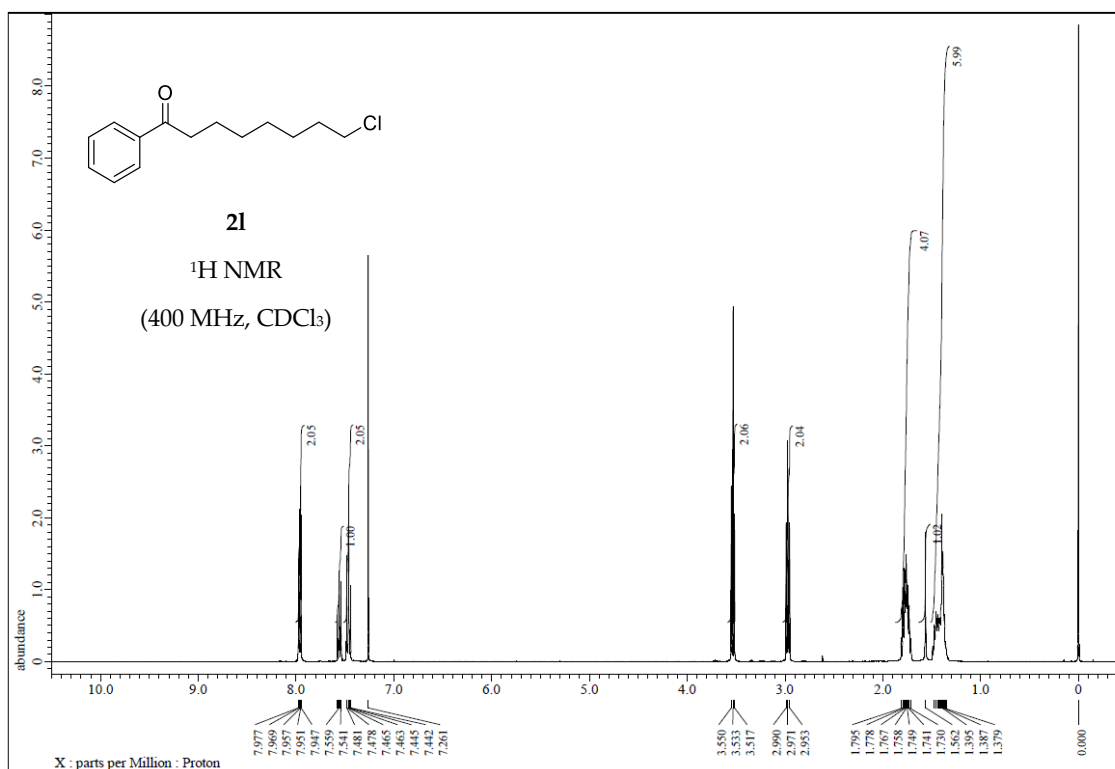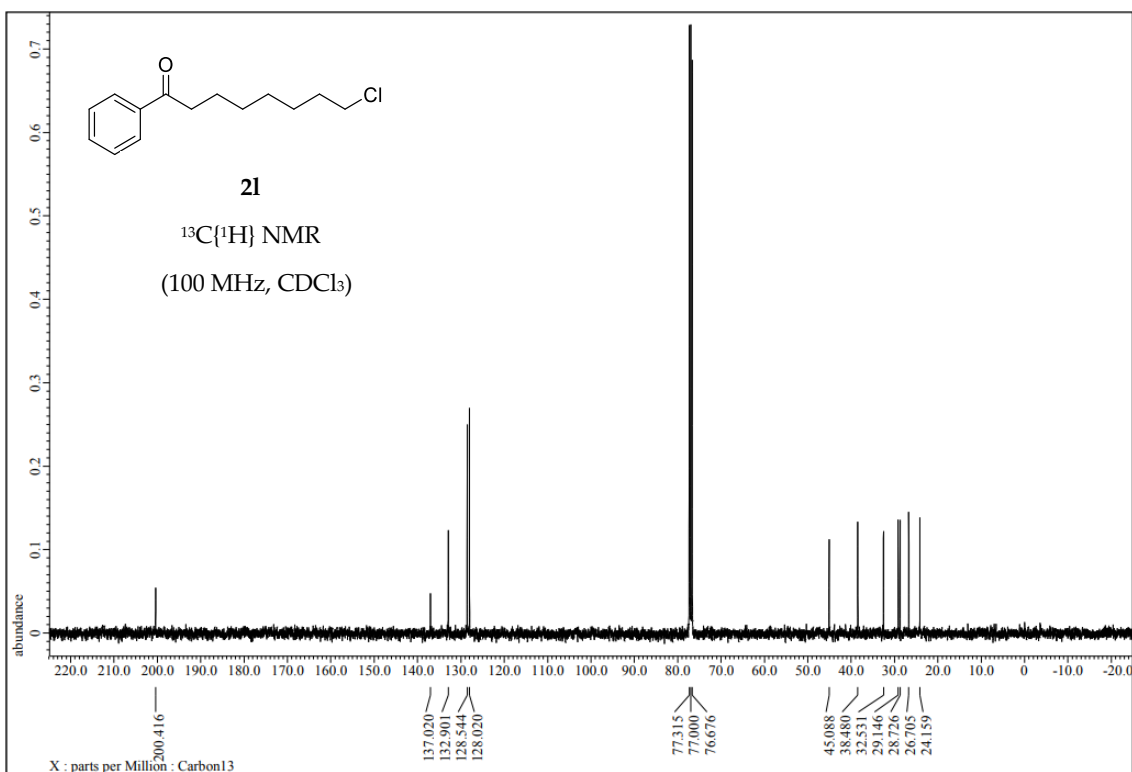

Supplement: s1 [file s1]
